# Supplementary material for: Longitudinal stability of urinary extracellular vesicle protein patterns within and between individuals
Source: PubMed Central journal article supplement (PMC8329217; doi:10.1038/s41598-021-95082-8), 2021-08-02
Supplement: 41598_2021_95082_MOESM1_ESM.pdf [file 41598_2021_95082_MOESM1_ESM.pdf]

## **SUPPLEMENTAL INFORMATION LEGENDS**

### **Supplementary Figure 1: Overview of the whole urinary EV proteome including the excluded 5 samples**

Total number of proteins identified (upper panel) and distribution of normalized protein intensities (lower panel) for all measured samples (n = 72). Samples excluded from further analysis based on the low protein count (n = 5) are shown with red border.

### **Supplementary Figure 2: Expression levels of most stable and variable urinary EV proteins**

**S2a.** Expression levels of selected ExoCarta [38] proteins per individual, detected in the top 10% most stable urinary EV proteome.

**S2b.** Expression levels of top 15 most stable urinary EV proteins per individual.

**S2c.** Expression levels of top 15 most variable urinary EV proteins per individual.

### **Supplementary Figure 3: Consistency of the urinary EV proteome within and between individuals**

Percentage of proteins identified in all individuals (core proteome, 39.3%), in more than 1 individual (total ~90%), and unique proteins per person (combined 10%)

### **Supplementary Figure 4: Protein interaction network of the core urinary EV proteome**

The protein interaction network of the core urinary EV proteome (516 proteins) was constructed using STRING [29] and was exported to Cytoscape [30] for further analysis. Protein clusters were identified using ClusterONE [31] and were annotated for biological function using BINGO [32]. When multiple biological functions were available for a protein, the most significant one was annotated on the network. When no function could be annotated, a manual search was conducted. Identified main pathways are clustered by a thick line and sub-networks are annotated within each pathway.

### **Supplementary Figure 5: Metabolic pathways enriched in the urinary EV proteome**

Proteins present in the core urinary EV proteome are highlighted in green in glycolysis, pentose-phosphate and amino acid synthesis pathways, adapted from KEGG pathways [56].

**Supplementary Figure 6: Gender-related differences in the urinary EV proteome**

**S6a.** Expression of female- (upper 2 panels) and male-specific (lower 2 panels) urinary EV proteins per person per individual.

**S6b.** Complete network of differentially expressed proteins ( $p < 0.05$ ) in female (pink) and male (blue) urinary EVs.

**Supplementary Table 1: Differentially expressed urinary EV proteins between females and males**

# Supplementary Figure 1

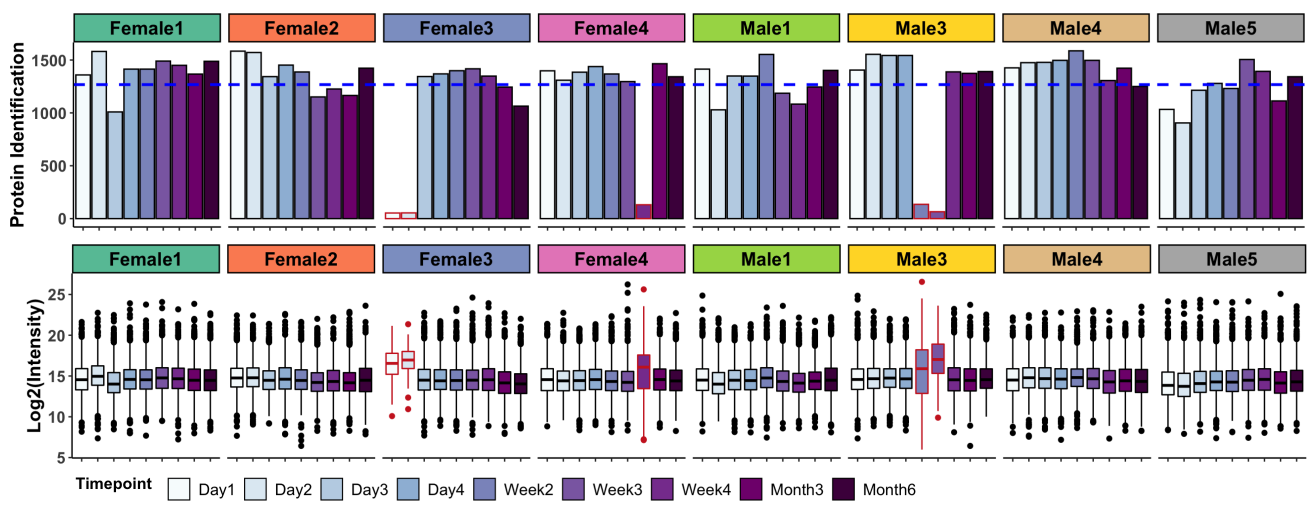

# Supplementary Figure 2

**a**

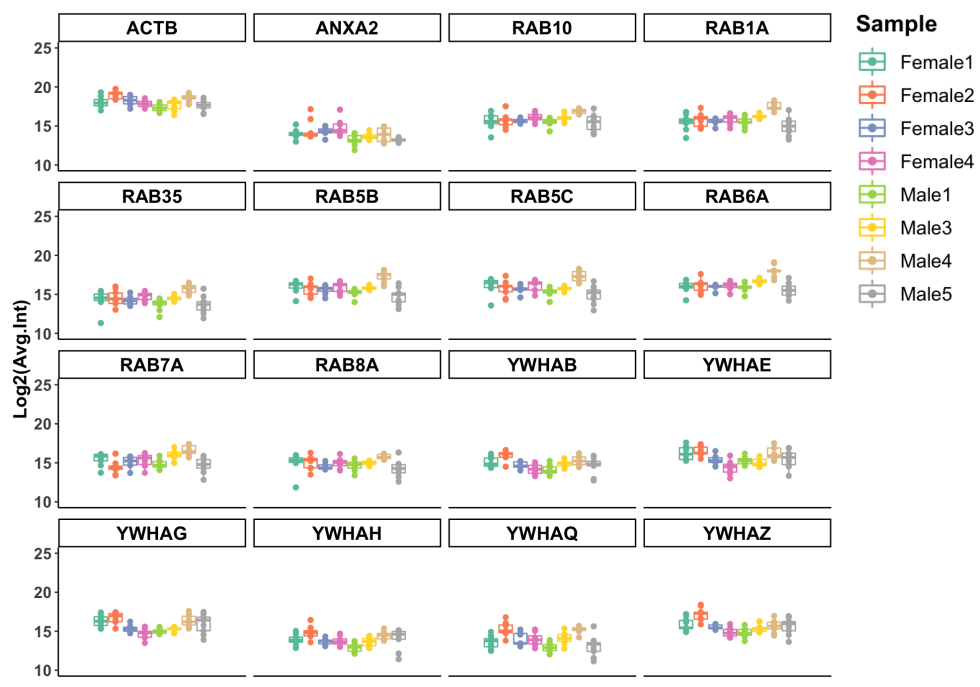

**b**

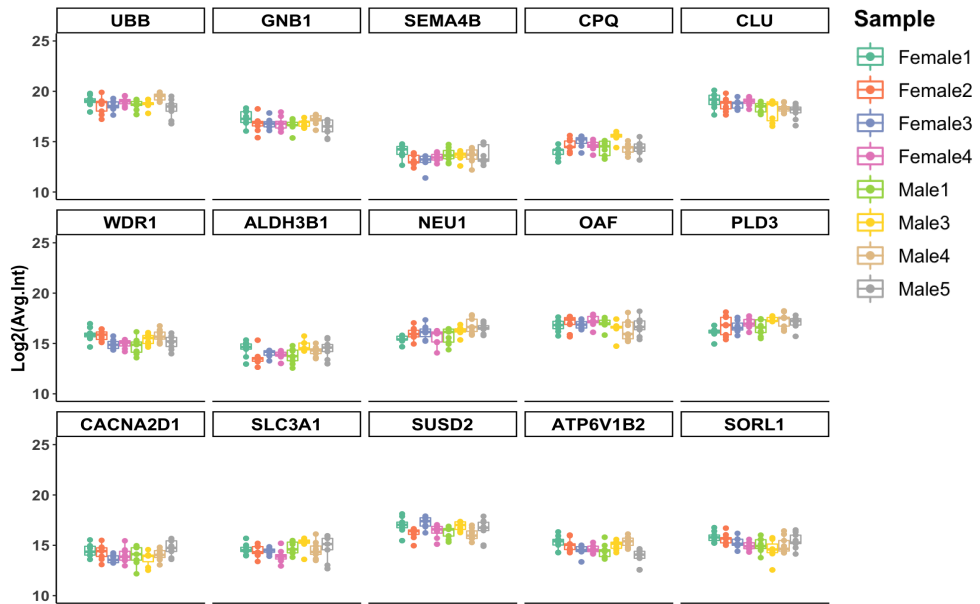

**c**

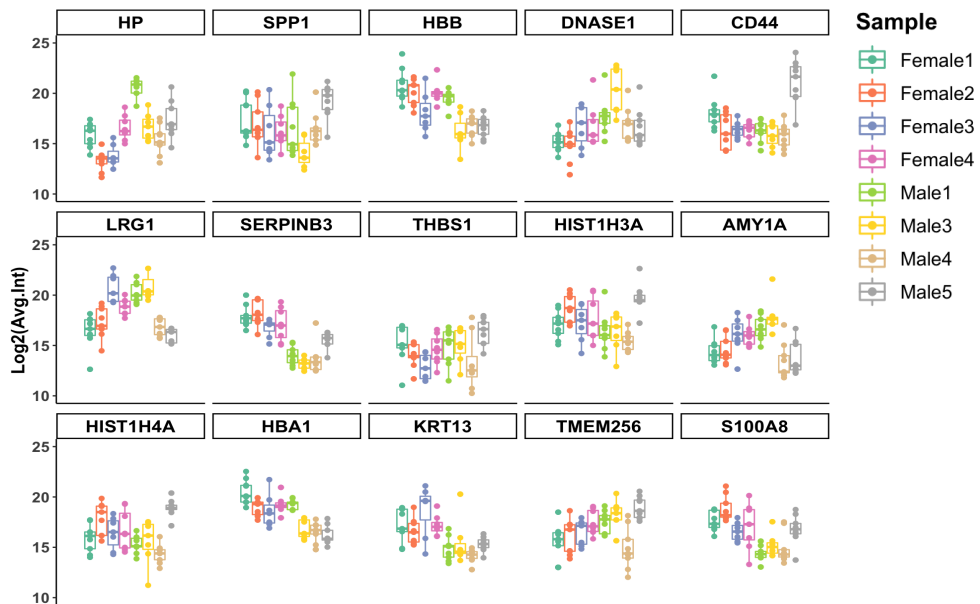

Supplementary Figure 3

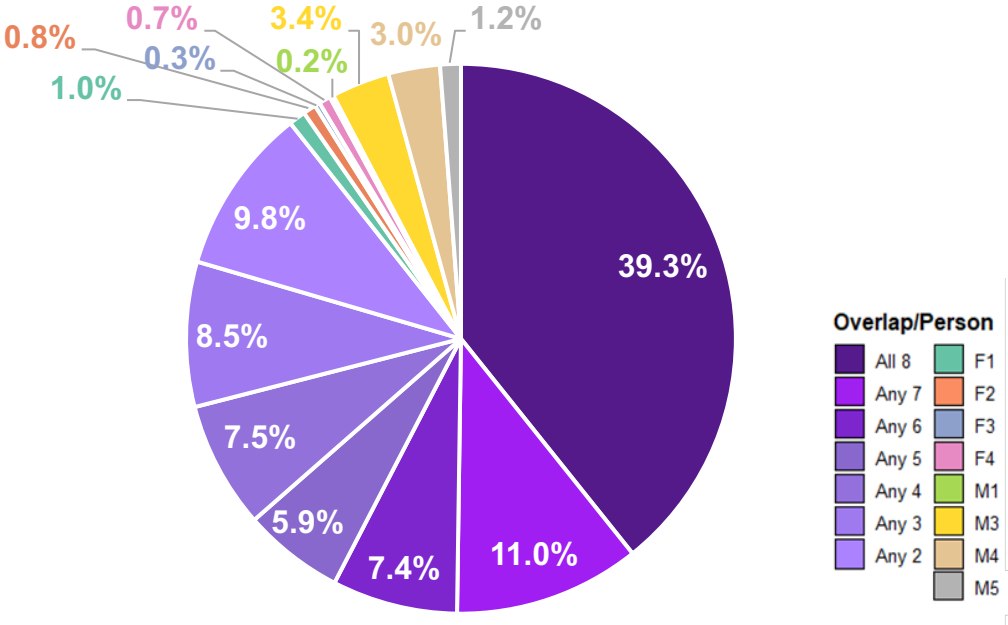

Supplementary Figure 4

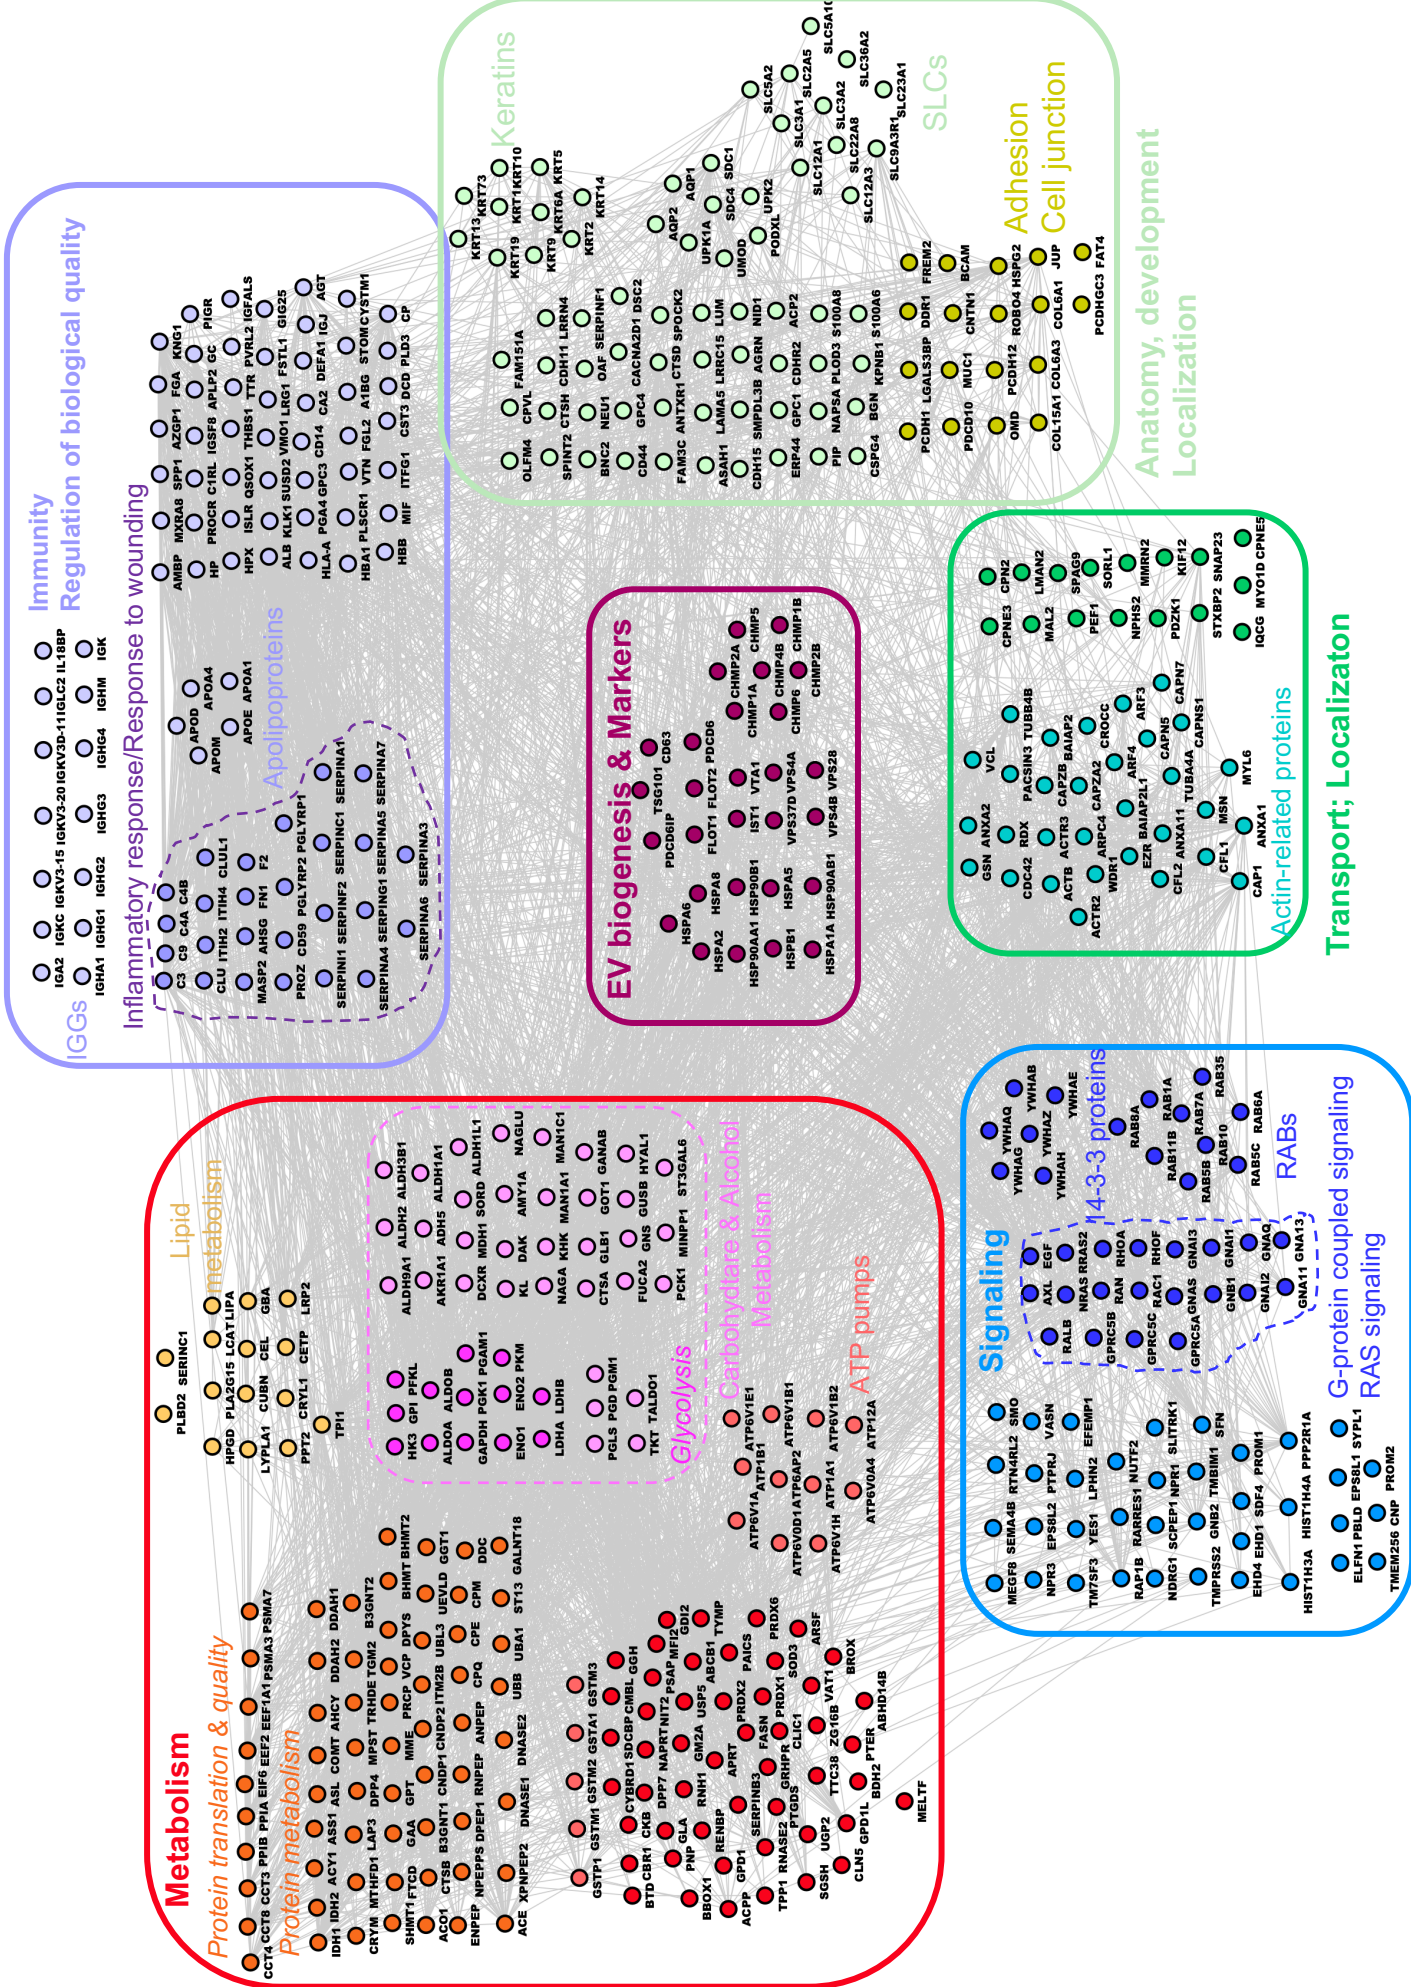



# Supplementary Figure 5

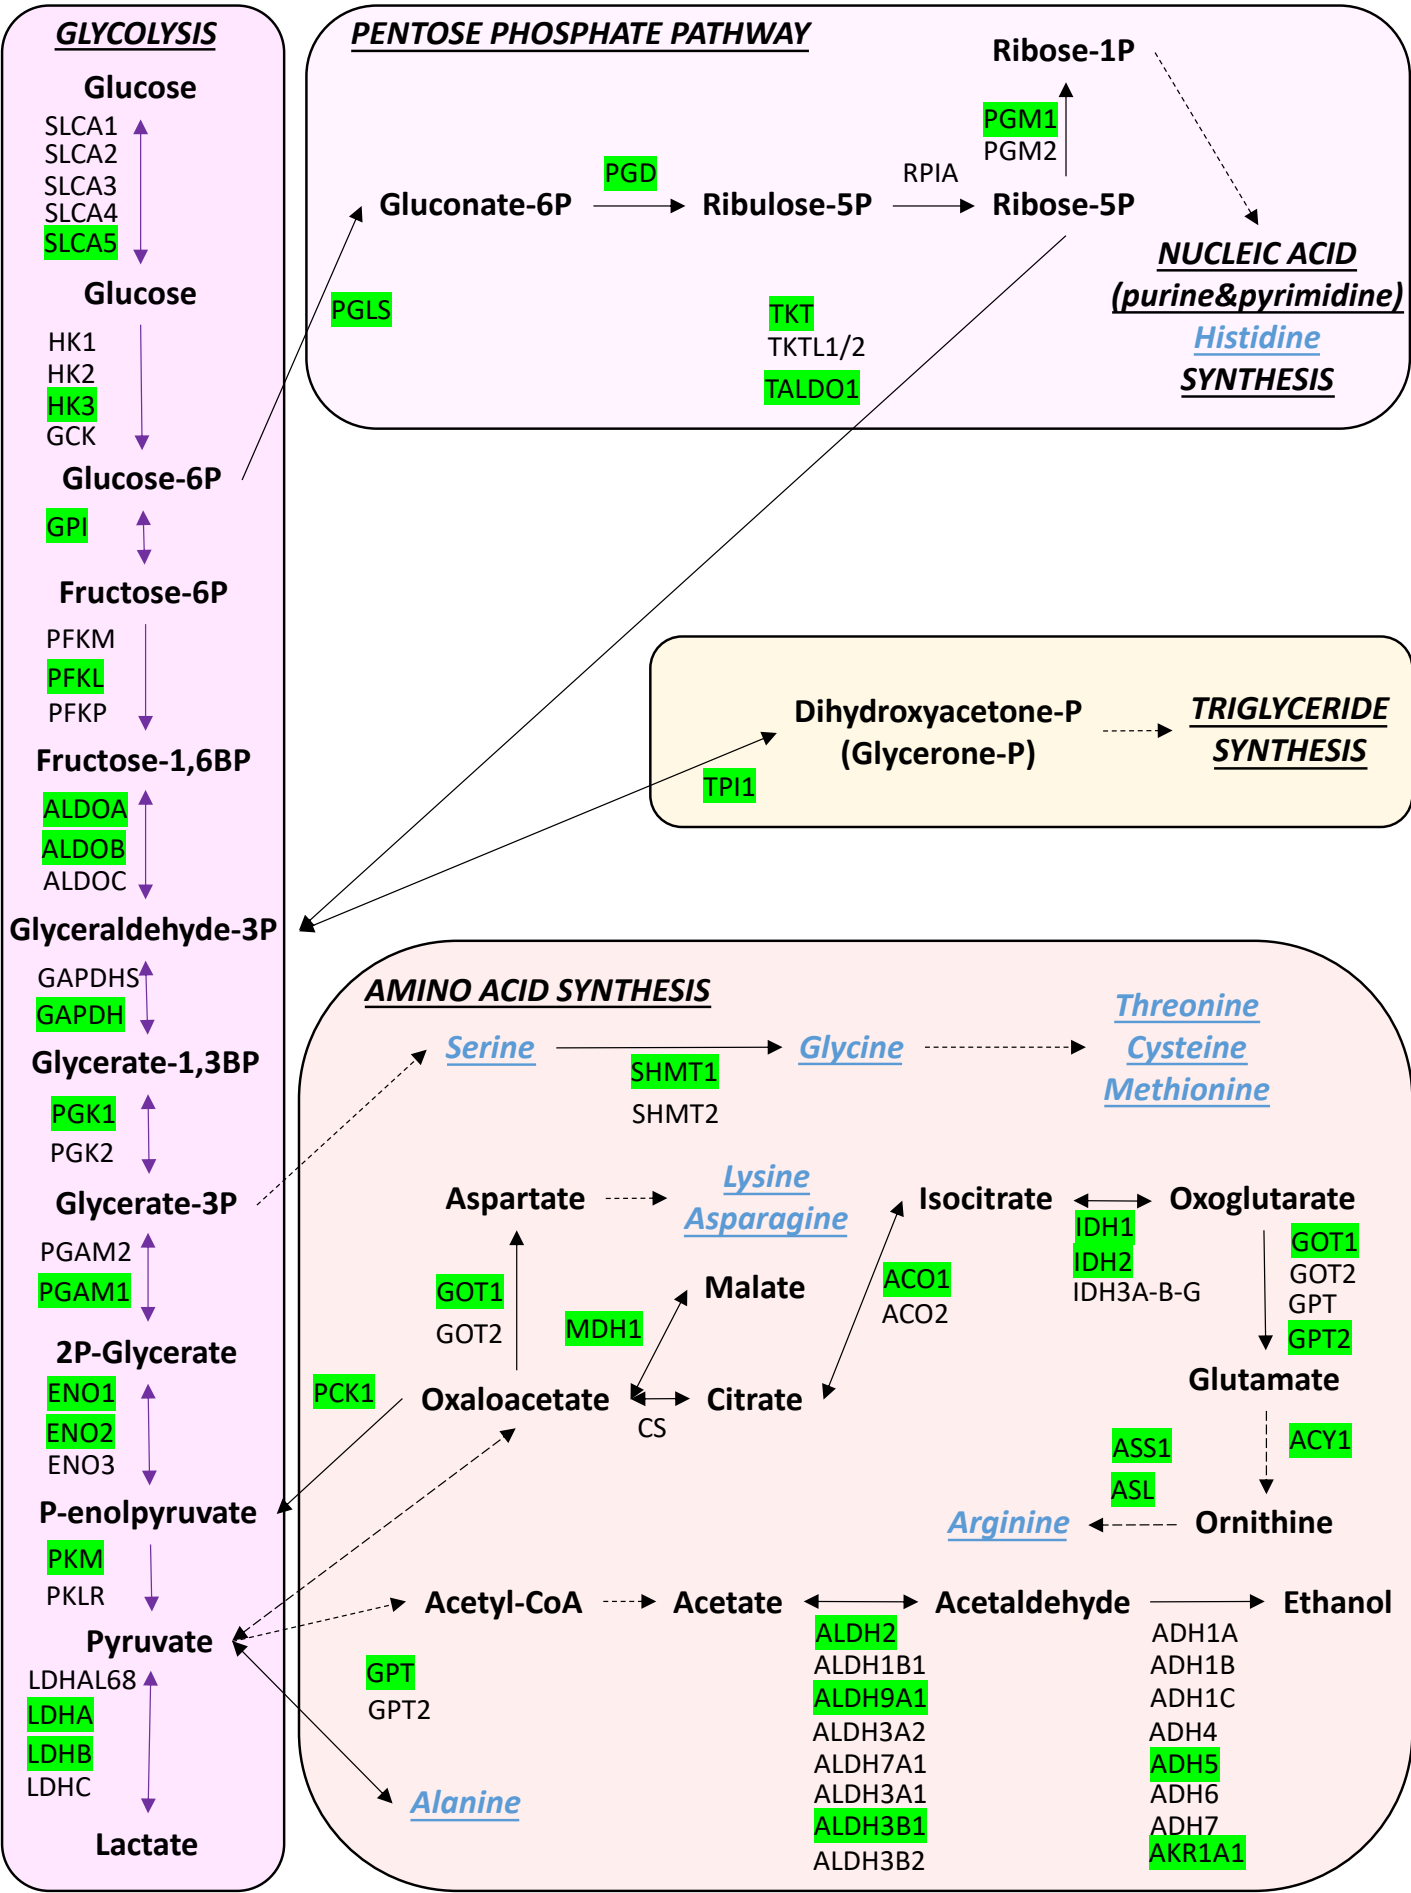

# Supplementary Figure 6

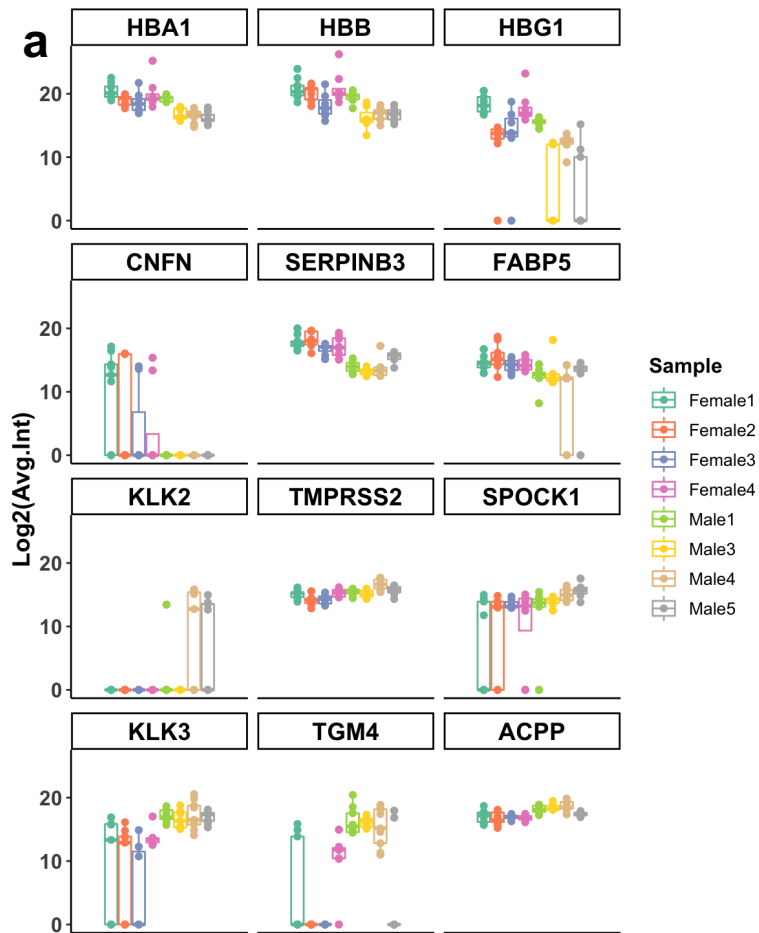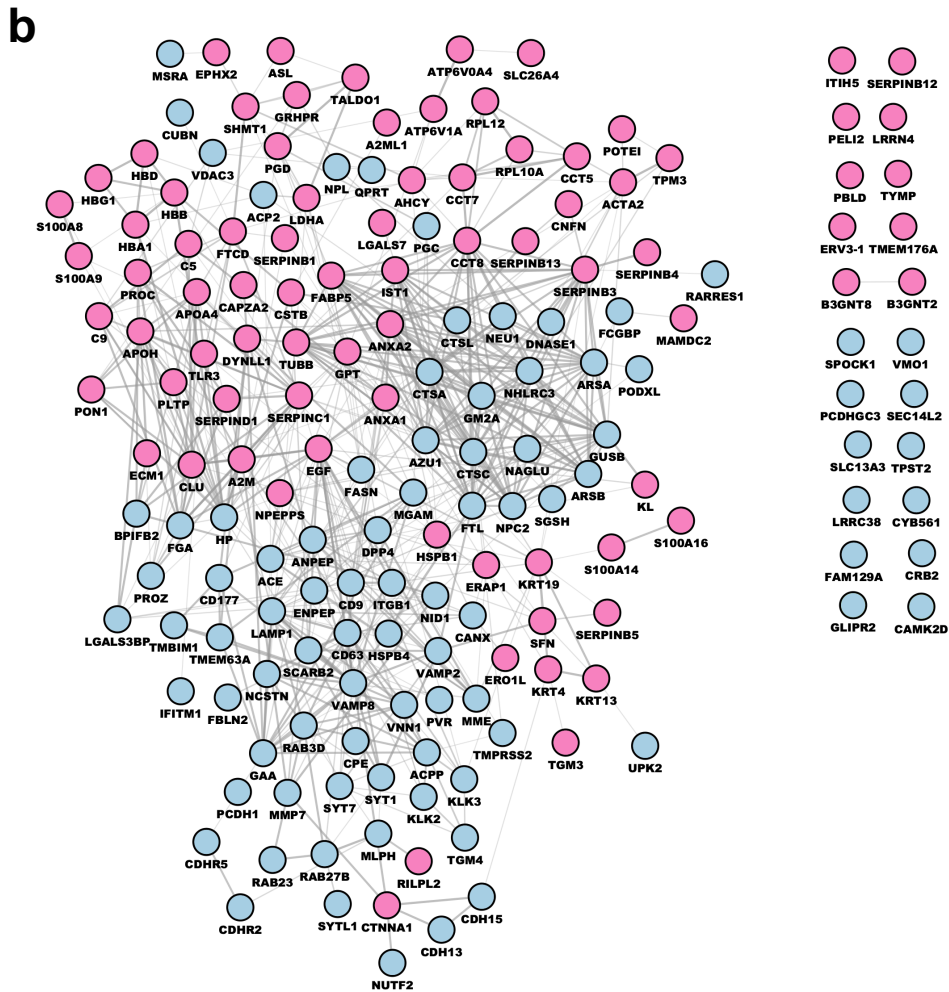



**Supplementary Table 1: Differentially expressed urinary EV proteins between females and males**

| First.Accession | Gene.Name | Fold.Change.<br>Female-vs-<br>Male | Adjusted.p.value.<br>BenjaminiHochberg |
|-----------------|-----------|------------------------------------|----------------------------------------|
| Q8IYJ3          | SYTL1     | -10000.00                          | 3.27E-08                               |
| Q9BZQ8          | FAM129A   | -10000.00                          | 1.36E-07                               |
| O43581          | SYT7      | -10000.00                          | 0.001245702                            |
| P20151          | KLK2      | -10000.00                          | 0.009181041                            |
| P21579          | SYT1      | -10000.00                          | 0.009247534                            |
| Q9BV36          | MLPH      | -10000.00                          | 0.010295001                            |
| P98095          | FBLN2     | -211.86                            | 0.001891316                            |
| Q13557          | CAMK2D    | -11.42                             | 0.007047928                            |
| O76054          | SEC14L2   | -10.60                             | 0.005691239                            |
| P49221          | TGM4      | -8.91                              | 0.0028655                              |
| Q9Y6R7          | FCGBP     | -7.51                              | 9.26E-07                               |
| P20160          | AZU1      | -7.46                              | 0.01700992                             |
| P07288          | KLK3      | -7.33                              | 4.47E-07                               |
| O00194          | RAB27B    | -6.64                              | 1.90E-09                               |
| P00738          | HP        | -6.26                              | 7.16E-05                               |
| Q8N6Q3          | CD177     | -5.31                              | 0.004734369                            |
| O95716          | RAB3D     | -4.84                              | 9.28E-09                               |
| P49447          | CYB561    | -4.59                              | 0.000352019                            |
| P55291          | CDH15     | -4.45                              | 9.28E-09                               |
| P24855          | DNASE1    | -3.78                              | 0.004734369                            |
| Q15274          | QPR1      | -3.78                              | 0.001891316                            |
| Q9BXD5          | NPL       | -3.71                              | 0.019230034                            |
| Q5VT99          | LRRC38    | -3.57                              | 0.000778741                            |
| Q9H4G4          | GLIPR2    | -3.46                              | 0.002264586                            |
| Q8N4F0          | BPIFB2    | -3.43                              | 0.00694433                             |
| P05556          | ITGB1     | -3.33                              | 0.009550765                            |
| P16870          | CPE       | -3.21                              | 0.000268542                            |
| P02489          | CRYAA     | -2.92                              | 0.024611145                            |
| Q9HBB8          | CDHR5     | -2.89                              | 4.08E-05                               |
| P02792          | FTL       | -2.73                              | 0.000457086                            |
| Q7Z5L0          | VMO1      | -2.72                              | 0.001680906                            |
| P55290          | CDH13     | -2.72                              | 0.004734369                            |
| P49788          | RARRES1   | -2.61                              | 0.018576086                            |
| Q5JS37          | NHLRC3    | -2.55                              | 0.008983708                            |
| Q92542          | NCSTN     | -2.52                              | 0.031959725                            |
| P27824-2        | CANX      | -2.52                              | 0.008488549                            |
| Q08380          | LGALS3BP  | -2.51                              | 0.005043204                            |
| P08962          | CD63      | -2.50                              | 0.011722787                            |
| P02671          | FGA       | -2.50                              | 0.011220947                            |
| Q5IJ48          | CRB2      | -2.46                              | 0.040631353                            |
| P15309          | ACPP      | -2.44                              | 9.26E-07                               |
| Q08174          | PCDH1     | -2.35                              | 0.003543264                            |
| P20142          | PGC       | -2.34                              | 0.033242112                            |
| P11279          | LAMP1     | -2.33                              | 0.002422723                            |
| P15144          | ANPEP     | -2.28                              | 0.000353402                            |
| Q9Y277          | VDAC3     | -2.27                              | 0.038401496                            |
| O43451          | MGAM      | -2.26                              | 0.0028655                              |
| P51688          | SGSH      | -2.24                              | 0.006619839                            |
| P49327          | FASN      | -2.22                              | 0.005691239                            |
| P22891          | PROZ      | -2.22                              | 0.006767551                            |
| O60704          | TPST2     | -2.22                              | 0.018255027                            |
| P54802          | NAGLU     | -2.22                              | 0.011601942                            |
| Q969X1          | TMBIM1    | -2.17                              | 0.003875578                            |
| Q07075          | ENPEP     | -2.16                              | 0.016061143                            |
| P27487          | DPP4      | -2.16                              | 0.004221379                            |
| Q08629          | SPOCK1    | -2.15                              | 0.006513971                            |
| P11117          | ACP2      | -2.13                              | 0.009489716                            |
| P14543          | NID1      | -2.11                              | 0.005668521                            |
| O15393          | TMPRSS2   | -2.11                              | 0.000289874                            |
| P17900          | GM2A      | -2.10                              | 0.045218326                            |
| P12821          | ACE       | -2.07                              | 0.000518731                            |
| O95497          | VNN1      | -2.06                              | 0.015677504                            |
| Q9ULC3          | RAB23     | -2.05                              | 0.023798828                            |
| P10253          | GAA       | -2.05                              | 0.047863845                            |
| P15289          | ARSA      | -2.05                              | 0.014648644                            |
| P08236          | GUSB      | -2.05                              | 0.015711295                            |
| Q9UJ68          | MSRA      | -2.03                              | 0.027962461                            |

|            |           |       |             |
|------------|-----------|-------|-------------|
| P21926     | CD9       | -2.01 | 0.045280871 |
| P61970     | NUTF2     | -2.00 | 0.046173676 |
| P09237     | MMP7      | -1.98 | 0.019677975 |
| Q8WWT9     | SLC13A3   | -1.96 | 0.033164556 |
| Q14108     | SCARB2    | -1.96 | 0.016668974 |
| Q9UN70     | PCDHGC3   | -1.93 | 0.000577093 |
| P13164     | IFITM1    | -1.92 | 0.047863845 |
| O00592     | PODXL     | -1.92 | 0.041184276 |
| P15848     | ARSB      | -1.92 | 0.016061143 |
| P10619     | CTSA      | -1.91 | 0.010385823 |
| O00526     | UPK2      | -1.91 | 0.033735205 |
| P07711     | CTSL      | -1.89 | 0.006413785 |
| Q9BYE9     | CDHR2     | -1.87 | 0.007585278 |
| Q9BV40     | VAMP8     | -1.86 | 0.008488549 |
| P53634     | CTSC      | -1.86 | 0.022076964 |
| P15151     | PVR       | -1.85 | 0.020659389 |
| P61916     | NPC2      | -1.83 | 0.013462747 |
| P08473     | MME       | -1.79 | 0.011722787 |
| O94886     | TMEM63A   | -1.70 | 0.013000087 |
| O60494     | CUBN      | -1.68 | 0.045280871 |
| P63027     | VAMP2     | -1.67 | 0.007592381 |
| Q99519     | NEU1      | -1.46 | 0.046928875 |
| Q9UEF7     | KL        | 1.57  | 0.043407228 |
| P10909     | CLU       | 1.59  | 0.006802172 |
| Q9NY97     | B3GNT2    | 1.64  | 0.045280871 |
| P23526     | AHCY      | 1.65  | 0.031959725 |
| Q9NZ08     | ERAP1     | 1.72  | 0.006767551 |
| P19971     | TYMP      | 1.76  | 0.035246341 |
| P47755     | CAPZA2    | 1.76  | 0.021881672 |
| P53990-2   | IST1      | 1.76  | 0.046173676 |
| AOA0C4DH41 | IGHV4-61  | 1.78  | 0.046173676 |
| P34896     | SHMT1     | 1.79  | 0.013632327 |
| P08727     | KRT19     | 1.79  | 0.024401019 |
| Q9UBQ7     | GRHPR     | 1.80  | 0.010798425 |
| Q7Z7M8     | B3GNT8    | 1.80  | 0.023139553 |
| P01133     | EGF       | 1.81  | 0.006513971 |
| P48643     | CCT5      | 1.81  | 0.007592381 |
| P50990     | CCT8      | 1.82  | 0.013329356 |
| Q9HAT8     | PELI2     | 1.83  | 0.035387948 |
| Q99832     | CCT7      | 1.84  | 0.019648215 |
| P07355     | ANXA2     | 1.88  | 0.00166712  |
| P55058     | PLTP      | 1.89  | 0.003463029 |
| P02748     | C9        | 1.91  | 0.045280871 |
| P01008     | SERPINC1  | 1.95  | 0.026362329 |
| P04080     | CSTB      | 1.96  | 0.016668974 |
| Q9HBG4     | ATP6V0A4  | 1.96  | 0.02926863  |
| P02749     | APOH      | 1.98  | 0.03719539  |
| P04792     | HSPB1     | 1.99  | 0.024028359 |
| Q8WUT4     | LRRN4     | 1.99  | 0.00254447  |
| O95954     | FTCD      | 2.00  | 0.024401019 |
| P00338     | LDHA      | 2.01  | 0.000806757 |
| P38606     | ATP6V1A   | 2.02  | 0.013329356 |
| P04424     | ASL       | 2.03  | 0.005620676 |
| P04070     | PROC      | 2.03  | 0.021820764 |
| Q86UX2     | ITIH5     | 2.09  | 0.004454783 |
| P30039     | PBLD      | 2.10  | 0.00694433  |
| O15455     | TLR3      | 2.10  | 0.013462747 |
| P07437     | TUBB      | 2.12  | 0.012956735 |
| Q7Z304     | MAMDC2    | 2.14  | 0.004734369 |
| P24298     | GPT       | 2.21  | 0.000848288 |
| P62906     | RPL10A    | 2.29  | 0.027227607 |
| Q9HCY8     | S100A14   | 2.29  | 0.003286095 |
| P06727     | APOA4     | 2.32  | 0.003876384 |
| P30050     | RPL12     | 2.34  | 0.020796673 |
| P34913     | EPHX2     | 2.36  | 0.006513971 |
| P37837     | TALDO1    | 2.38  | 0.001639332 |
| P55786     | NPEPPS    | 2.40  | 0.000667665 |
| Q969X0     | RILPL2    | 2.43  | 0.024611145 |
| P05546     | SERPIND1  | 2.44  | 0.001639332 |
| Q96P63-2   | SERPINB12 | 2.48  | 0.004693205 |
| P52209     | PGD       | 2.50  | 0.0001624   |
| P31947     | SFN       | 2.54  | 0.013462747 |
| O43511     | SLC26A4   | 2.63  | 0.041652273 |

|          |           |          |             |
|----------|-----------|----------|-------------|
| P01031   | C5        | 2.64     | 0.011793199 |
| P30740   | SERPINB1  | 2.84     | 0.000142067 |
| P01023   | A2M       | 2.94     | 0.018118446 |
| Q08188   | TGM3      | 3.10     | 0.004347306 |
| P35221   | CTNNA1    | 3.10     | 1.47E-06    |
| Q01469   | FABP5     | 3.11     | 0.001639332 |
| P47929   | LGALS7    | 3.22     | 0.026742036 |
| P27169   | PON1      | 3.22     | 0.000289874 |
| Q96FQ6   | S100A16   | 3.39     | 0.00166712  |
| P19013   | KRT4      | 3.47     | 0.000264996 |
| P63167   | DYNLL1    | 3.70     | 0.046928875 |
| P04083   | ANXA1     | 3.97     | 9.26E-07    |
| P0CG38   | POTE1     | 4.62     | 0.01650879  |
| P05109   | S100A8    | 4.84     | 3.69E-06    |
| P69905   | HBA1      | 5.01     | 3.48E-06    |
| P13646   | KRT13     | 5.28     | 9.26E-07    |
| Q16610   | ECM1      | 5.29     | 0.026681074 |
| P36952   | SERPINB5  | 5.35     | 2.69E-08    |
| P62736   | ACTA2     | 5.99     | 0.033242112 |
| P48594   | SERPINB4  | 6.49     | 9.01E-06    |
| P06702   | S100A9    | 6.52     | 1.81E-07    |
| P68871   | HBB       | 6.71     | 3.28E-06    |
| P02042   | HBD       | 6.76     | 5.15E-06    |
| P69891   | HBG1      | 7.80     | 0.000367605 |
| A8K2U0   | A2ML1     | 8.61     | 2.62E-12    |
| Q96HE7   | ERO1A     | 9.39     | 8.17E-05    |
| P29508   | SERPINB3  | 10.39    | 1.94E-13    |
| Q9UIV8   | SERPINB13 | 16.03    | 2.62E-12    |
| Q9BYD5   | CNFN      | 10000.00 | 0.000770822 |
| Q96HP8   | TMEM176A  | 10000.00 | 0.006872338 |
| P06753-2 | TPM3      | 10000.00 | 0.007558296 |
| Q14264   | ERV3-1    | 10000.00 | 0.04460078  |
